# Supplementary material for: Investigating the Effects of Organonitrogen Types on Hydrodearomatization Reactions over Commercial NiMoS Catalyst
Source: MDPI journal article supplement (doi:10.3390/catal12070736), 2022-07-03
Supplement: s1 [file s1]

Archive with 1 entries (1 files):
- catalysts-1733511-supplementary.pdf
